# Supplementary material for: Magnesium hydroxide bulk and colloid-associated 152Eu in an alkaline environment: colloid characterisation and sorption properties in the presence and absence of carbonate
Source: Royal Society of Chemistry journal article supplement (doi:10.1039/b714636c), 2008-01-01
Supplement: b714636c.pdf [file b714636c.pdf]

Supplementary Material (ESI) for Journal of Environmental Monitoring  
This journal is © The Royal Society of Chemistry 2007

**Supplementary material** Stability constants for the different species to be considered from the LLNL database

| Species                                             | <sup>a</sup> Stability constants (log β <sup>0</sup> ) |
|-----------------------------------------------------|--------------------------------------------------------|
| Eu(CO <sub>3</sub> ) <sup>+</sup>                   | -2.4057                                                |
| Eu(CO <sub>3</sub> ) <sub>2</sub> <sup>-</sup>      | -8.3993                                                |
| Eu(CO <sub>3</sub> ) <sub>3</sub> <sup>3-</sup>     | -16.8155                                               |
| Eu(OH) <sup>2+</sup>                                | -7.9075                                                |
| Eu(OH) <sub>2</sub> <sup>+</sup>                    | -14.8609                                               |
| Eu(OH) <sub>3</sub>                                 | -24.1253                                               |
| Eu(OH) <sub>4</sub> <sup>-</sup>                    | -36.5958                                               |
| Eu(OH)(CO <sub>3</sub> )                            | -8.4941                                                |
| Eu(OH) <sub>2</sub> (CO <sub>3</sub> ) <sup>-</sup> | -17.8462                                               |
| Eu(OH)(CO <sub>3</sub> ) <sub>2</sub> <sup>2-</sup> | -15.1760                                               |
| pKs Eu(OH) <sub>3</sub>                             | 15.3482                                                |

<sup>a</sup> HCO<sub>3</sub><sup>-</sup> is the master species.
